# Supplementary material for: TaZFP 23, a new Cys2/His2-type zinc-finger protein, is a regulator of wheat (Triticum aestivum L.) growth and abiotic stresses
Source: PeerJ journal article supplement (doi:10.7717/peerj.18956), 2025-02-17
Supplement: Figure_5AB_Raw_data.zip [file Figure_5AB_Raw_data.zip]

## Sheet: sheet
WT		Control						80mM						100mM						120mM
		a	b	c	a-Germination rate	b-Germination rate	c-Germination rate	a	b	c	a-Germination rate	b-Germination rate	c-Germination rate	a	b	c	a-Germination rate	b-Germination rate	c-Germination rate	a	b	c	a-Germination rate	b-Germination rate	c-Germination rate
	1D	21	24	27	0.4375	0.5	0.5625	3	5	6	0.0612245	0.102041	0.122449	1	2	4	0.0204082	0.0408163	0.0816327	1	2	2	0.0204082	0.0408163	0.0408163
	2D	45	45	47	0.9375	0.9375	0.979167	32	33	30	0.653061	0.673469	0.612245	21	19	17	0.428571	0.387755	0.346939	7	10	8	0.142857	0.204082	0.163265
	3D	46	48	47	0.958333	1	0.979167	46	46	39	0.938776	0.938776	0.795918	38	41	42	0.77551	0.836735	0.857143	29	32	38	0.591837	0.653061	0.77551
	4D	48	48	48	1	1	1	46	48	48	0.938776	0.979592	0.979592	46	47	43	0.938776	0.959184	0.877551	36	42	45	0.734694	0.857143	0.918367
	5D	48	48	48	1	1	1	49	49	49	1	1	1	46	48	46	0.938776	0.979592	0.938776	40	44	46	0.816327	0.897959	0.938776
OE-5	1D	20	22	28	0.416667	0.458333	0.583333	1	1	3	0.0204082	0.0204082	0.0612245	0	1	0	0	0.0204082	0	0	0	1	0	0	0.0204082
	2D	45	47	46	0.9375	0.979167	0.958333	7	8	10	0.142857	0.163265	0.204082	1	3	2	0.0204082	0.0612245	0.0408163	1	0	2	0.0204082	0	0.0408163
	3D	46	48	48	0.958333	1	1	19	21	16	0.387755	0.428571	0.326531	6	7	5	0.122449	0.142857	0.102041	3	2	2	0.0612245	0.0408163	0.0408163
	4D	48	48	48	1	1	1	30	29	26	0.612245	0.591837	0.530612	10	15	10	0.204082	0.306122	0.204082	8	4	7	0.163265	0.0816327	0.142857
	5D	48	48	48	1	1	1	37	38	31	0.755102	0.77551	0.632653	18	20	16	0.367347	0.408163	0.326531	15	9	13	0.306122	0.183673	0.265306
OE-31	1D	27	19	20	0.5625	0.527778	0.555556	1	0	1	0.0204082	0	0.0204082	0	0	0	0	0	0	0	0	0	0	0	0
	2D	47	35	35	0.979167	0.972222	0.972222	4	6	6	0.0816327	0.122449	0.122449	3	1	2	0.0612245	0.0204082	0.0408163	0	0	0	0	0	0
	3D	47	35	36	0.979167	0.972222	1	17	16	14	0.346939	0.326531	0.285714	7	6	11	0.142857	0.122449	0.22449	1	1	1	0.0204082	0.0204082	0.0204082
	4D	47	36	36	0.979167	1	1	28	26	24	0.571429	0.530612	0.489796	9	9	20	0.183673	0.183673	0.408163	6	5	6	0.122449	0.102041	0.122449
	5D	48	36	36	1	1	1	36	36	30	0.734694	0.734694	0.612245	15	14	26	0.306122	0.285714	0.530612	10	9	12	0.204082	0.183673	0.244898
