# Supplementary material for: TaZFP 23, a new Cys2/His2-type zinc-finger protein, is a regulator of wheat (Triticum aestivum L.) growth and abiotic stresses
Source: PeerJ journal article supplement (doi:10.7717/peerj.18956), 2025-02-17
Supplement: Figure_5CD_Raw_data.zip [file Figure_5CD_Raw_data.zip]

## Sheet: sheet 1
WT		Control						200mM						250mM
		1	2	3	1（%）	2（%）	3（%）	1	2	3	1（%）	2（%）	3（%）	1	2	3	1（%）	2（%）	3（%）
	1D	21	24	27	0.4375	0.5	0.5625	8	8	9	0.190476	0.190476	0.214286	1	4	3	0.0238095	0.0952381	0.0714286
	2D	45	45	47	0.9375	0.9375	0.979167	34	36	39	0.809524	0.857143	0.928571	22	31	22	0.52381	0.738095	0.52381
	3D	46	48	47	0.958333	1	0.979167	39	41	40	0.928571	0.97619	0.952381	33	38	30	0.785714	0.904762	0.714286
	4D	48	48	48	1	1	1	42	42	41	1	1	0.97619	38	40	37	0.904762	0.952381	0.880952
	5D	48	48	48	1	1	1	42	42	41	1	1	0.97619	40	40	39	0.952381	0.952381	0.928571
OE-5	1D	20	22	28	0.416667	0.458333	0.583333	5	4	3	0.119048	0.0952381	0.0714286	1	2	0	0.0238095	0.047619	0
	2D	45	47	46	0.9375	0.979167	0.958333	16	15	17	0.380952	0.357143	0.404762	8	18	12	0.190476	0.428571	0.285714
	3D	46	48	48	0.958333	1	1	29	22	27	0.690476	0.52381	0.642857	23	28	25	0.547619	0.666667	0.595238
	4D	48	48	48	1	1	1	33	34	30	0.785714	0.809524	0.714286	27	33	31	0.642857	0.785714	0.738095
	5D	48	48	48	1	1	1	34	35	35	0.809524	0.833333	0.833333	32	36	34	0.761905	0.857143	0.809524
OE-31	1D	27	19	20	0.5625	0.527778	0.555556	1	3	3	0.0238095	0.0714286	0.0714286	1	2	0	0.0238095	0.047619	0
	2D	47	35	35	0.979167	0.972222	0.972222	16	18	30	0.380952	0.428571	0.714286	6	11	15	0.142857	0.261905	0.357143
	3D	47	35	36	0.979167	0.972222	1	25	33	27	0.595238	0.785714	0.642857	22	18	25	0.52381	0.428571	0.595238
	4D	47	36	36	0.979167	1	1	35	30	36	0.833333	0.714286	0.857143	31	32	34	0.738095	0.761905	0.809524
	5D	48	36	36	1	1	1	37	38	37	0.880952	0.904762	0.880952	33	35	35	0.785714	0.833333	0.833333
