# Supplementary material for: TaZFP 23, a new Cys2/His2-type zinc-finger protein, is a regulator of wheat (Triticum aestivum L.) growth and abiotic stresses
Source: PeerJ journal article supplement (doi:10.7717/peerj.18956), 2025-02-17
Supplement: Figure_5E_F_raw_data.zip [file Figure_5E_F_raw_data.zip]

## Sheet: sheet1
WT		Control						0.50μM						1.0μM
		1	2	3	1（%）	2（%）	3（%）	1	2	3	1（%）	2（%）	3（%）	1	2	3	1（%）	2（%）	3（%）
	1D	21	24	27	0.4375	0.5	0.5625	17	16	15	0.404762	0.380952	0.357143	3	2	4	0.0714286	0.047619	0.0952381
	2D	45	45	47	0.9375	0.9375	0.979167	36	34	39	0.857143	0.809524	0.928571	25	18	21	0.595238	0.428571	0.5
	3D	46	48	47	0.958333	1	0.979167	42	42	42	1	1	1	35	37	32	0.833333	0.880952	0.761905
	4D	48	48	48	1	1	1	42	42	42	1	1	1	40	41	42	0.952381	0.97619	1
	5D	48	48	48	1	1	1	42	42	41	1	1	0.97619	40	41	42	0.952381	0.97619	1
OE-5	1D	20	22	28	0.416667	0.458333	0.583333	4	4	7	0.0952381	0.0952381	0.166667	4	2	6	0.0952381	0.047619	0.142857
	2D	45	47	46	0.9375	0.979167	0.958333	20	28	27	0.47619	0.666667	0.642857	18	16	18	0.428571	0.380952	0.428571
	3D	46	48	48	0.958333	1	1	35	38	36	0.833333	0.904762	0.857143	27	29	28	0.642857	0.690476	0.666667
	4D	48	48	48	1	1	1	40	41	39	0.952381	0.97619	0.928571	39	40	37	0.928571	0.952381	0.880952
	5D	48	48	48	1	1	1	41	41	39	0.97619	0.97619	0.928571	41	41	38	0.97619	0.97619	0.904762
OE-31	1D	27	19	20	0.5625	0.527778	0.555556	7	5	8	0.166667	0.119048	0.190476	3	2	4	0.0714286	0.047619	0.0952381
	2D	47	35	35	0.979167	0.972222	0.972222	25	26	30	0.595238	0.619048	0.714286	21	17	17	0.5	0.404762	0.404762
	3D	47	35	36	0.979167	0.972222	1	42	36	39	1	0.857143	0.928571	31	26	31	0.738095	0.619048	0.738095
	4D	47	36	36	0.979167	1	1	42	40	41	1	0.952381	0.97619	40	39	37	0.952381	0.928571	0.880952
	5D	48	36	36	1	1	1	42	41	41	1	0.97619	0.97619	41	40	40	0.97619	0.952381	0.952381
